# Supplementary material for: Lyophilized Emulsions of Thymol and Eugenol Essential Oils Encapsulated in Cellulose
Source: MDPI journal article supplement (doi:10.3390/polym16101422), 2024-05-17
Supplement: s1 [file s1]

## Supporting information

### Lyophilized Emulsions of Thymol and Eugenol Essential Oils Encapsulated by Cellulose

Koranit Shlosman<sup>1,2</sup>, Dmitry M. Rein<sup>3</sup>, Rotem Shemesh<sup>2</sup>, Yachin Cohen<sup>3,+</sup>

1 The Interdepartmental program in polymer engineering, Technion-Israel Institute of Technology, 32000 Haifa, Israel

2 Carmel Olefins Ltd., 31014 Haifa, Israel

3 Faculty of Chemical Engineering, Technion-Israel Institute of Technology, 32000 Haifa, Israel

+ Corresponding author, email: yachinc@technion.ac.il

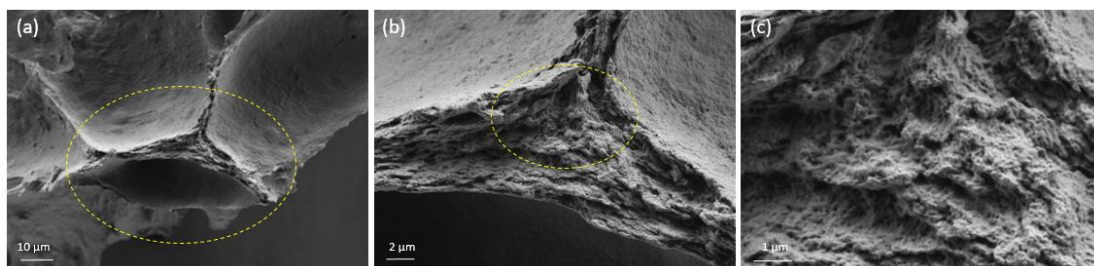

Figure S1: HR-SEM micrographs of hydrogel\_lyo at different magnifications. Dashed yellow circles indicate the area focused in the subsequent image.

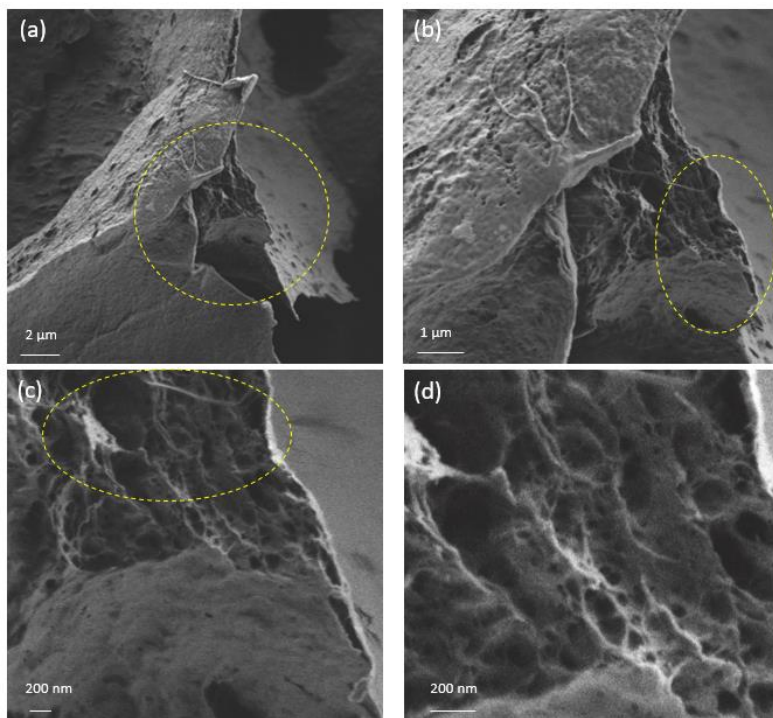

Figure S2: HR-SEM micrographs of EU-1:8-10k\_lyo at different resolutions magnifications. Dashed yellow circles indicate the area focused in the subsequent image.

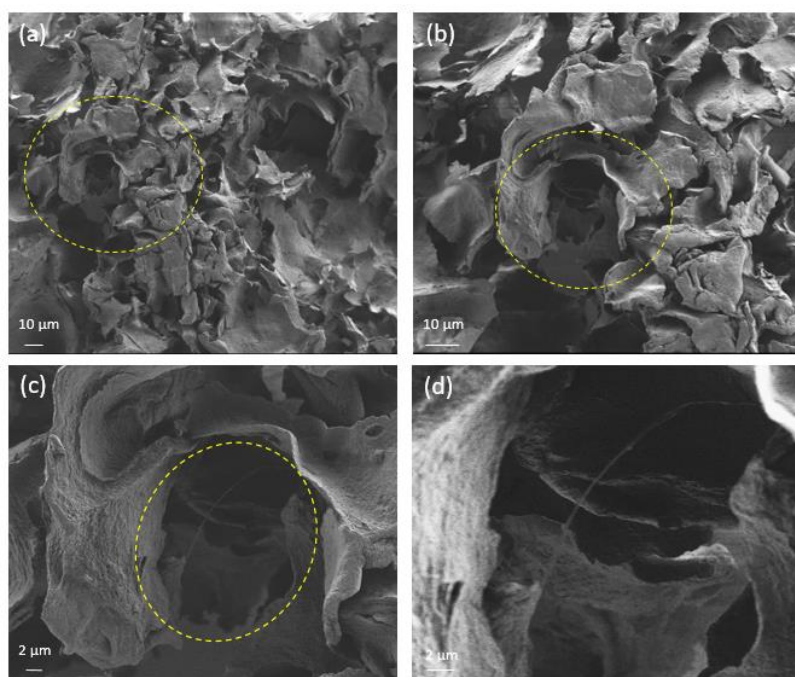

Figure S3: HR-SEM micrographs of TY-1:8-10k\_lyo at different resolutions magnifications. Dashed yellow circles indicate the area focused in the subsequent image.

Table S1: TGA Raw data for weight loss

| Weight loss (%) | Time (min) |      |      |      |      |      |      |      |      |      |       |      |       |       |      |
|-----------------|------------|------|------|------|------|------|------|------|------|------|-------|------|-------|-------|------|
|                 | 0          | 10   | 50   | 100  | 150  | 200  | 250  | 300  | 350  | 400  | 500   | 600  | 700   | 800   | 900  |
| Hydrogel_lyo    | 0          | 7.0  | 7.7  | 7.8  | 7.9  | 8.0  | 8.0  | 8.1  | 8.1  |      |       |      |       |       |      |
| neat TY         | 0          | 1.2  | 11.6 | 25.2 | 38.7 | 51.8 | 64.6 | 77.3 | 89.4 | 99.0 | 100.0 | 100  | 100   | 100   | 100  |
| TY-1:8-10k_lyo  | 0          | 10.7 | 18.6 | 26.7 | 33.6 | 38.2 | 41.6 | 42.9 | 46.4 | 48.0 | 50.5  | 52.6 | 54.5  | 56.2  | 57.7 |
| neat EU         | 0          | 1.1  | 5.8  | 11.4 | 16.9 | 22.4 | 27.8 | 33.0 | 38.2 | 43.4 | 53.3  | 62.4 | 70.6  | 77.7  | 82.9 |
| EU-1:8-10k_lyo  | 0          | 1.7  | 3.9  | 6.2  | 8.5  | 10.9 | 13.1 | 15.5 | 17.8 | 20.2 | 24.7  | 29.2 | 33.74 | 38.07 | 42.3 |

Table S2: TGA water-reduced data for weight loss: Eugenol @ 40 C, Thymol @ 50 C

| Weight loss (%) | Time (min) |      |      |      |      |      |      |      |      |      |       |       |       |       |       |
|-----------------|------------|------|------|------|------|------|------|------|------|------|-------|-------|-------|-------|-------|
|                 | 0          | 10   | 50   | 100  | 150  | 200  | 250  | 300  | 350  | 400  | 500   | 600   | 700   | 800   | 900   |
| neat TY         | 0          | 1.2  | 11.6 | 25.2 | 38.7 | 51.8 | 64.6 | 77.3 | 89.4 | 99.0 | 100.0 | 100.0 | 100.0 | 100.0 | 100.0 |
| TY-1:8-10k_lyo  | 0          | 9.9  | 17.7 | 25.7 | 32.6 | 37.2 | 40.6 | 41.9 | 45.4 | 47.0 | 49.5  | 51.6  | 53.5  | 55.2  | 56.7  |
| neat EU         | 0          | 1.1  | 5.8  | 11.4 | 16.9 | 22.4 | 27.8 | 33.0 | 38.2 | 43.4 | 53.3  | 62.4  | 70.6  | 77.7  | 82.9  |
| EU-1:8-10k_lyo  | 0          | -2.2 | -0.8 | 1.3  | 3.3  | 5.7  | 7.9  | 10.3 | 12.6 | 15.0 | 19.5  | 24.0  | 28.5  | 32.9  | 37.1  |

$$\text{Equation S1: } TY \text{ water} - \text{reduced data}_{time\ t} = \% \text{ weight loss}_{time\ t, TY-1:8-10k_{lyo}} - \frac{\% \text{ weight loss}_{time\ t, Hydrogel_{Lyo}}}{8.1} * 10\%$$

$$\text{Equation S2: } EU \text{ water} - \text{reduced data}_{time\ t} = \% \text{ weight loss}_{time\ t, EU-1:8-10k_{lyo}} - \frac{\% \text{ weight loss}_{time\ t, Hydrogel_{Lyo}}}{8.1} * 5.2\%$$

Table S3: TGA normalized data for weight loss.

| Weight loss (%) | Time (min) |      |      |      |      |      |      |      |      |      |       |       |       |       |       |
|-----------------|------------|------|------|------|------|------|------|------|------|------|-------|-------|-------|-------|-------|
|                 | 0          | 10   | 50   | 100  | 150  | 200  | 250  | 300  | 350  | 400  | 500   | 600   | 700   | 800   | 900   |
| Free TY         | 0.0        | 1.2  | 11.6 | 25.2 | 38.7 | 51.8 | 64.6 | 77.3 | 89.4 | 99.0 | 100.0 | 100.0 | 100.0 | 100.0 | 100.0 |
| TY-1:8-10k_lyo  | 0.0        | 12.6 | 22.6 | 32.8 | 41.5 | 47.4 | 51.7 | 53.3 | 57.9 | 59.8 | 63.1  | 65.8  | 68.1  | 70.3  | 72.3  |
| Free EU         | 0.0        | 1.1  | 5.8  | 11.4 | 16.9 | 22.4 | 27.8 | 33.0 | 38.2 | 43.4 | 53.3  | 62.4  | 70.6  | 77.7  | 82.9  |
| EU-1:8-10k_lyo  | 0.0        | -2.9 | -1.0 | 1.7  | 4.3  | 7.3  | 10.2 | 13.3 | 16.2 | 19.3 | 25.1  | 31.0  | 36.8  | 42.4  | 47.9  |

$$\text{Equation S3: } TY \text{ normalized}_{time\ t} = \frac{TY \text{ water} - \text{reduced data}_{time\ t}}{0.785}$$

$$\text{Equation S4: } EU = \frac{EU \text{ water} - \text{reduced data}_{time\ t}}{0.775}$$
